# Supplementary material for: A double-negative feedback loop between E2F3b and miR- 200b regulates docetaxel chemosensitivity of human lung adenocarcinoma cells
Source: PubMed Central journal article supplement (PMC5053675; doi:10.18632/oncotarget.8376), 2016-03-25
Supplement: oncotarget-07-27613-s001.pdf [file oncotarget-07-27613-s001.pdf]

## A double-negative feedback loop between E2F3b and miR-200b regulates docetaxel chemosensitivity of human lung adenocarcinoma cells

### SUPPLEMENTARY TABLE

Supplementary Table S1: The primers used for pSil/shE2F3-1~3 and pSil/shcontrol

| ID                   | seq                                                            |                           |        |                            |           |
|----------------------|----------------------------------------------------------------|---------------------------|--------|----------------------------|-----------|
| E2F3(pcDNA/E2F3a)-P1 | GTCCGGACTCAGATCTCGAGCTATGAGAAAGGGAATCCAGC                      |                           |        |                            |           |
| E2F3(pcDNA/E2F3a)-P2 | TATCTAGATCCGGTGGATCCTCAACTACACATGAAGTCTTCCACC                  |                           |        |                            |           |
| ID                   | seq                                                            |                           |        |                            |           |
| E2F3(pcDNA/E2F3b)-P1 | GTCCGGACTCAGATCTCGAGCTATGCCCTTACA<br>GCAGCAGGCAAAGCGAAGGCTGGAG |                           |        |                            |           |
| E2F3(pcDNA/E2F3b)-P2 | TATCTAGATCCGGTGGATCCTCAACT<br>ACACATGAAGTCTTCCACC              |                           |        |                            |           |
| ID                   | 5'                                                             | stem                      | loop   | stem                       | 3'        |
| E2F3-RNAi(1)-a       | GATCCC                                                         | ccAACTCAGGA<br>CATAGCGATT | CTCGAG | AATCGCTATGTC<br>CTGAGTTGG  | TTTTTGGAT |
| E2F3-RNAi(1)-b       | AGCTATCCAAAAA                                                  | ccAACTCAGGA<br>CATAGCGATT | CTCGAG | AATCGCTATGTC<br>CTGAGTTGG  | GG        |
| E2F3-RNAi(2)-a       | GATCCC                                                         | ccTGACTCAATAG<br>AGAGCCTA | CTCGAG | TAGGCTCTCTAT<br>TGAGTCAGG  | TTTTTGGAT |
| E2F3-RNAi(2)-b       | AGCTATCCAAAAA                                                  | ccTGACTCAATAG<br>AGAGCCTA | CTCGAG | TAGGCTCTCTATT<br>GAGTCAGG  | GG        |
| E2F3-RNAi(3)-a       | GATCCC                                                         | ccAAACTGTTATAG<br>TTGTGAA | CTCGAG | TTCACA ACTATAA<br>CAGTTTGG | TTTTTGGAT |
| E2F3-RNAi(3)-b       | AGCTATCCAAAAA                                                  | ccAAACTGTTATA<br>GTTGTGAA | CTCGAG | TTCACA ACTATA<br>ACAGTTTGG | GG        |
